# Supplementary material
Source: PubMed Central journal article supplement (PMC1413687)

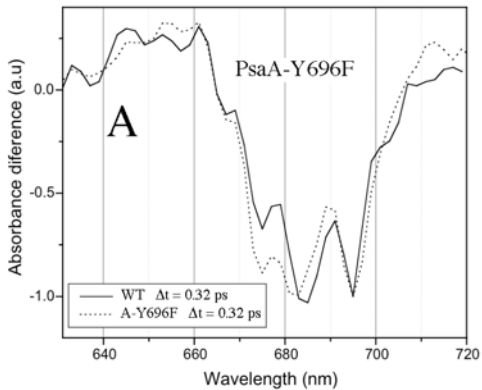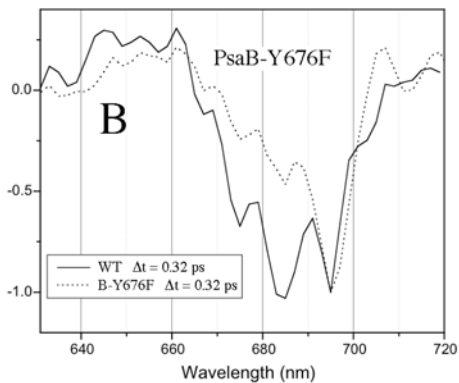

Supplement: pnas_0506537103_1.pdf [file pnas_0506537103_1.pdf]
